# Supplementary material
Source: MDPI journal article supplement (https://www.mdpi.com/2313-0105/10/5/145)
Supplement: s1 [file s1]

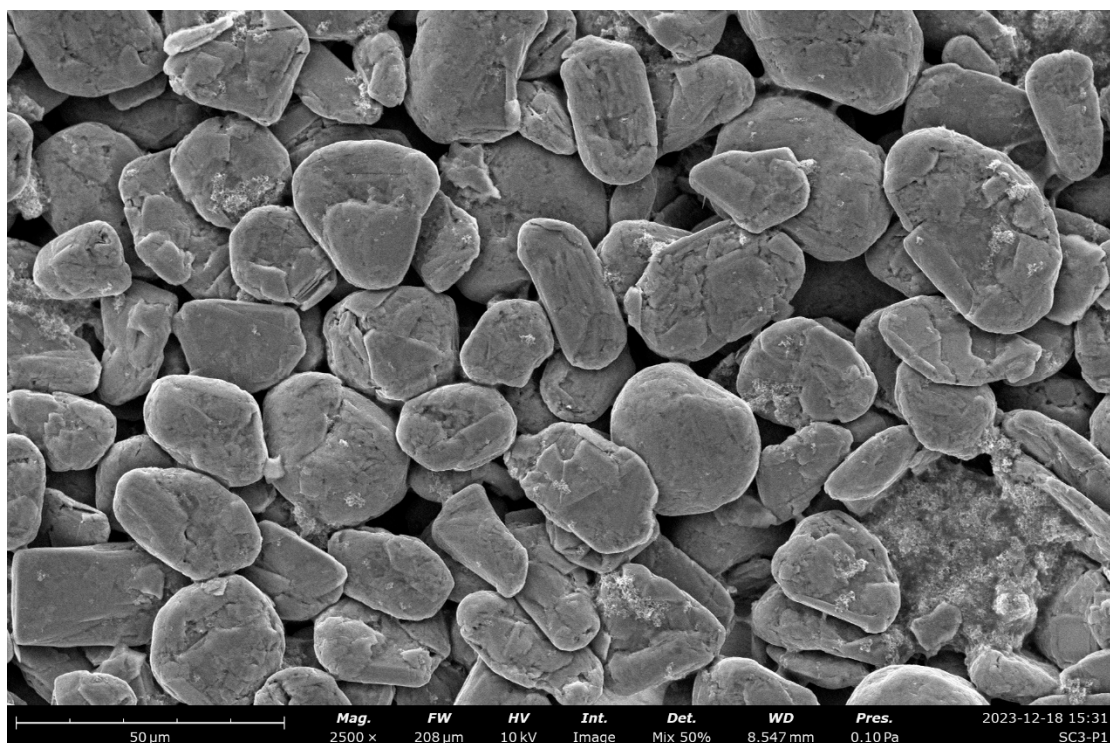

(a) Graphite anode slurry produced at 120 rpm and  $0.4 \text{ kgh}^{-1}$

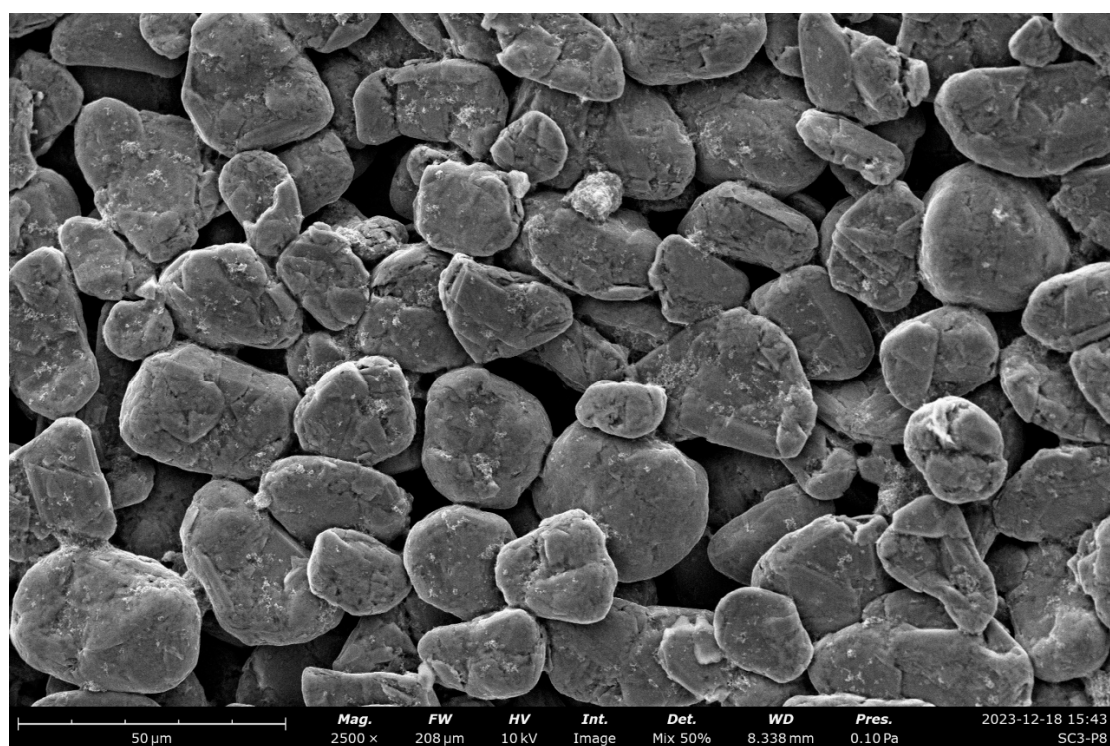

(b) Graphite anode slurry produced at 900 rpm and  $0.4 \text{ kgh}^{-1}$

Figure S1: SEM image of the produced anode slurries at 120 RPM (a) and 900 RPM (b).

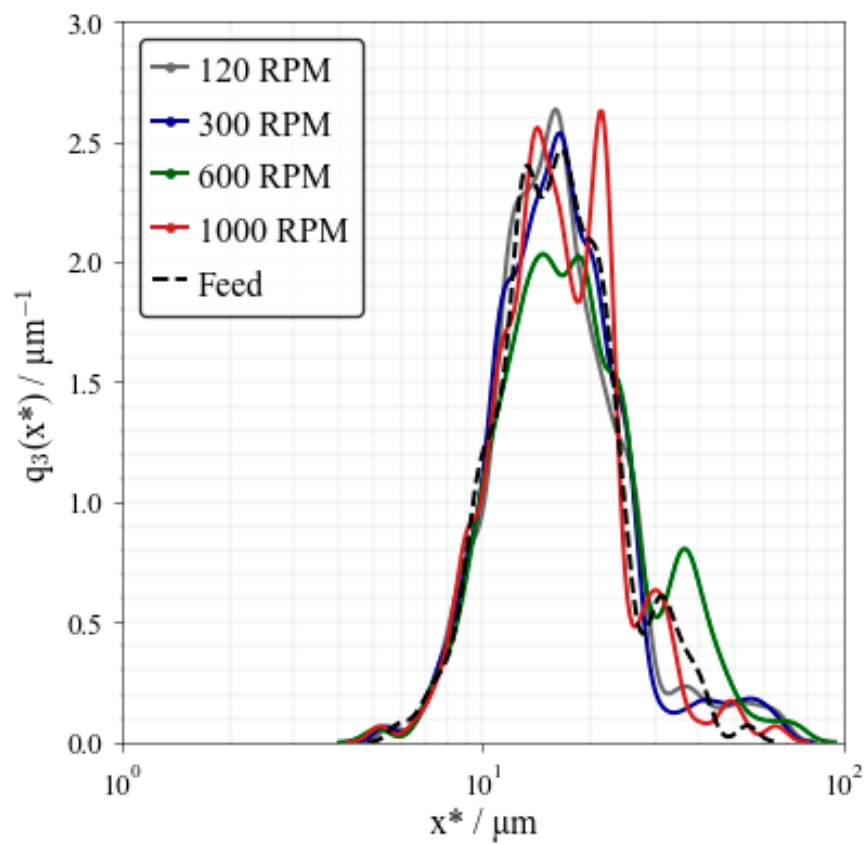

Figure S2: Particle size distributions of graphite after extrusion at different screw speeds, compared to the initial distribution (Feed).
